# Supplementary material
Source: Springer Nature journal article supplement (https://www.springermedizin.de/resource/supplementary/12885_2013_3907_MOESM4_ESM.pdf/9464732)

*Control-1*

*Cldn1 KD-3*

*Cldn1 KD-4*

*Control-2*

21kD

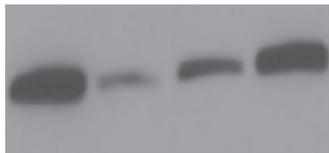

Claudin 1

42kD

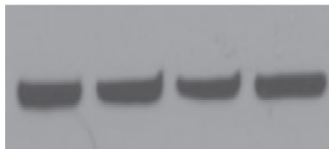

$\beta$ -actin

Supplement: MOESM4 [file 9464732]
